# Supplementary material for: Short-term Exposure to Particulate Matter Constituents and Mortality in a National Study of U.S. Urban Communities
Source: PubMed Central journal article supplement (PMC3801200; doi:10.1289/ehp.1206185), 2013-08-02

## **Supplemental Material**

### **Short-term Exposure to Particulate Matter Constituents and Mortality in a National Study of U.S. Urban Communities**

Jenna R. Krall, G. Brooke Anderson, Francesca Dominici, Michelle L. Bell, Roger D. Peng

#### **Table of Contents**

Table S1: National-average mortality risk estimates for lags 0 and 2 (page 2)

Figure S1: Season-specific mortality risk estimates for lag 0 (page 3)

Figure S2: Season-specific mortality risk estimates for lag 2 (page 4)

Figure S3: Region-specific mortality risk estimates for lag 0 (page 5)

Figure S4: Region-specific mortality risk estimates for lag 2 (page 6)

Supplemental Material, Table S1: National average estimated percent increase in mortality associated with an IQR increase in PM<sub>2.5</sub> constituents on the same day (lag 0) and two days before (lag 2) for single pollutant models.

| Pollutant         | Lag 0                           |                    | Lag 2                           |                    |
|-------------------|---------------------------------|--------------------|---------------------------------|--------------------|
|                   | Estimate (95% PI <sup>a</sup> ) | P(>0) <sup>b</sup> | Estimate (95% PI <sup>a</sup> ) | P(>0) <sup>b</sup> |
| PM <sub>2.5</sub> | 0.15 (-0.03, 0.34)              | 0.95               | -0.01 (-0.20, 0.18)             | 0.44               |
| OCM               | -0.04 (-0.38, 0.29)             | 0.40               | 0.17 (-0.13, 0.47)              | 0.87               |
| EC                | -0.14 (-0.38, 0.10)             | 0.13               | 0.14 (-0.08, 0.36)              | 0.89               |
| Silicon           | 0.03 (-0.13, 0.20)              | 0.65               | 0.01 (-0.14, 0.17)              | 0.56               |
| Sodium Ion        | -0.01 (-0.17, 0.16)             | 0.46               | 0.00 (-0.15, 0.16)              | 0.51               |
| Nitrate           | -0.01 (-0.21, 0.19)             | 0.46               | 0.04 (-0.15, 0.24)              | 0.67               |
| Ammonium          | 0.11 (-0.20, 0.42)              | 0.76               | -0.06 (-0.38, 0.25)             | 0.35               |
| Sulfate           | 0.29 (-0.10, 0.68)              | 0.93               | -0.26 (-0.64, 0.12)             | 0.09               |

<sup>a</sup> 95% PI: 95% posterior intervals for the mortality effect estimate

<sup>b</sup> P(>0): posterior probabilities that the mortality effect estimate is greater than 0

Supplemental Material, Figure S1: Season-specific estimated percent increase in mortality (95% posterior intervals [95% PI]) associated with an IQR increase in PM<sub>2.5</sub> constituents on the same day (lag 0) for single pollutant models. Seasons are defined: winter (w: December 21 – March 20), spring (sp: March 21 – June 20), summer (su: June 21 – September 20), fall (f: September 21 – December 20).

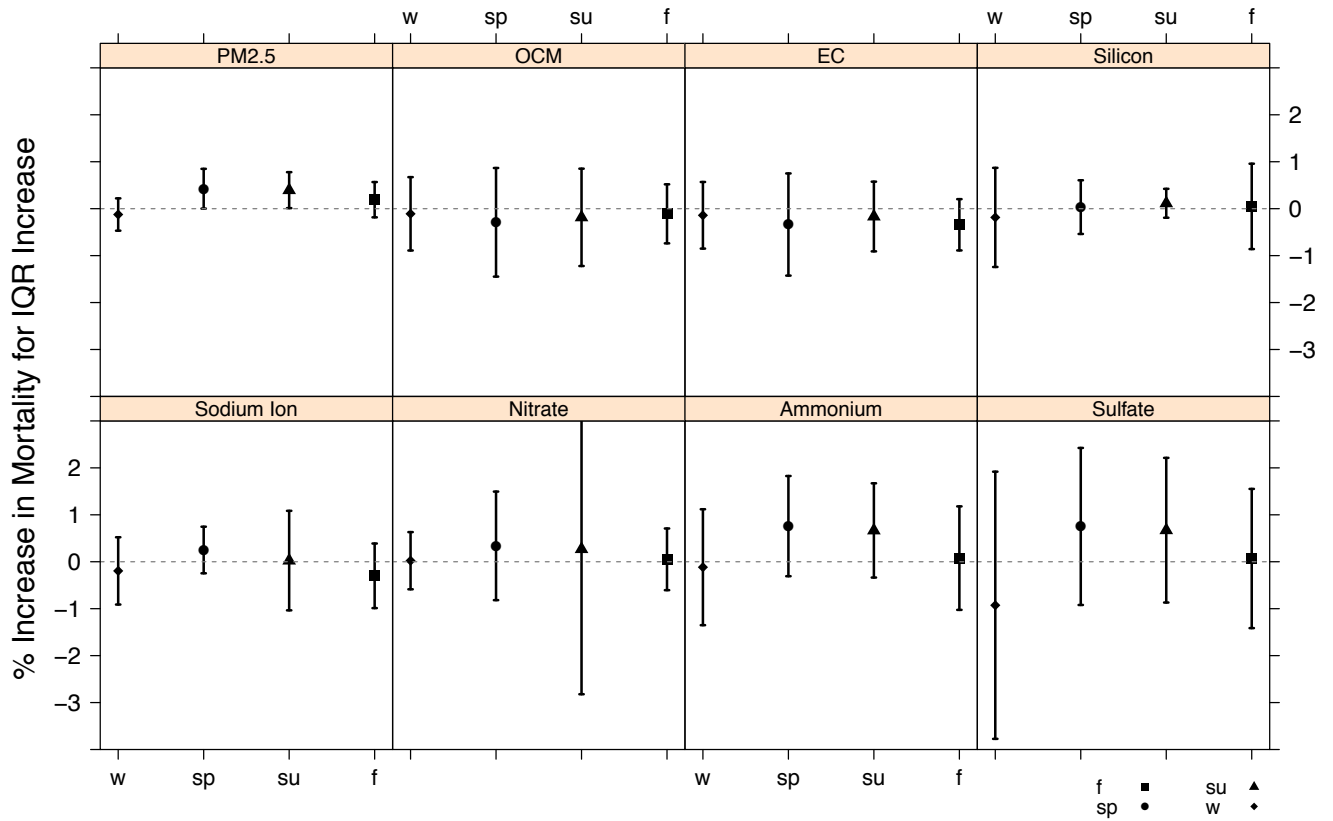

Supplemental Material, Figure S2: Season-specific estimated percent increase in mortality (95% posterior intervals [95% PI]) associated with an IQR increase in PM<sub>2.5</sub> constituents two days before (lag 2) for single pollutant models. Seasons are defined: winter (w: December 21 – March 20), spring (sp: March 21 – June 20), summer (su: June 21 – September 20), fall (f: September 21 – December 20).

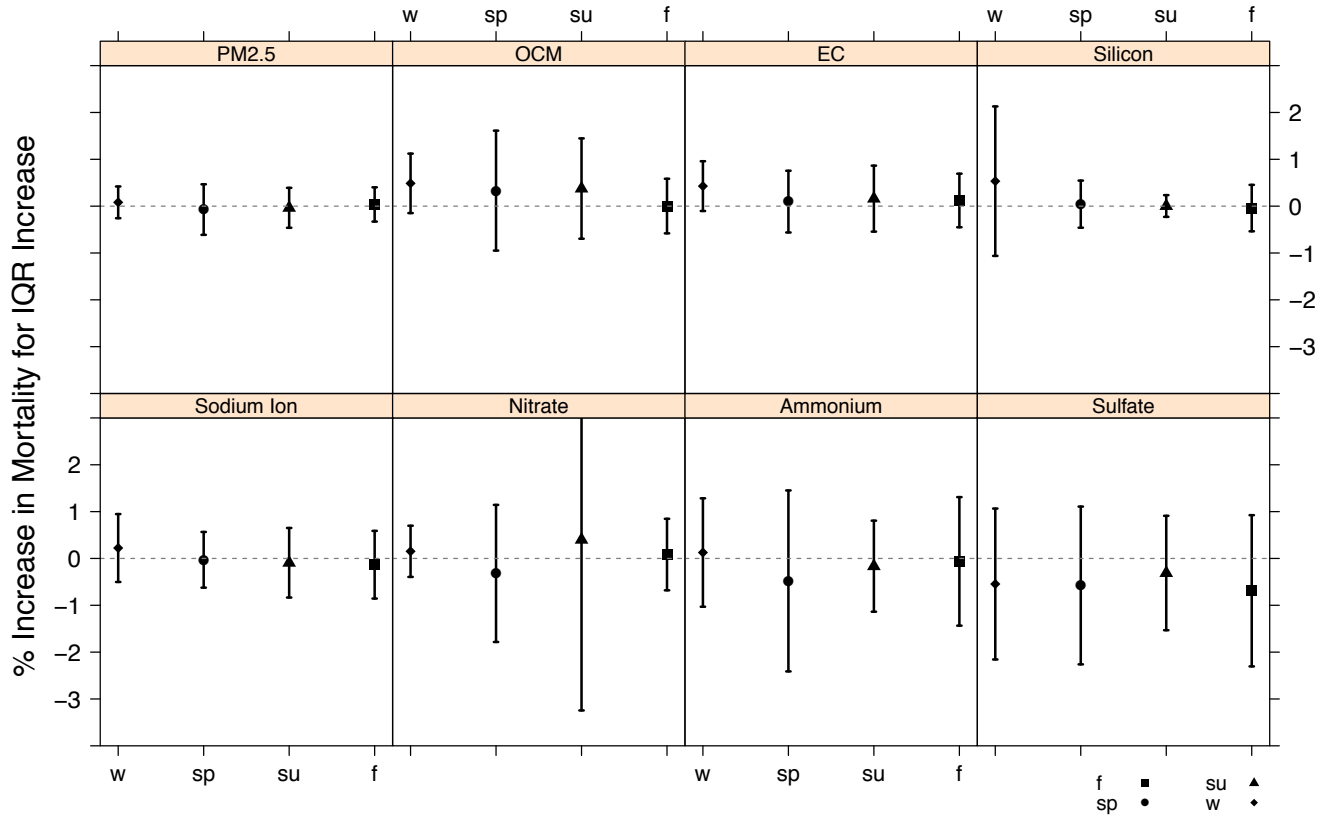

Supplemental Material, Figure S3: Region-specific estimated percent increase in mortality (95% posterior intervals [95% PI]) associated with an IQR increase in PM<sub>2.5</sub> constituents on the same day (lag 0) for single pollutant models. Region designations include: NE, northeast; NMW, north midwest; NW, northwest; SE, southeast; SMW south midwest; SW southwest. See Figure 1 in the main text for a map of the regions.

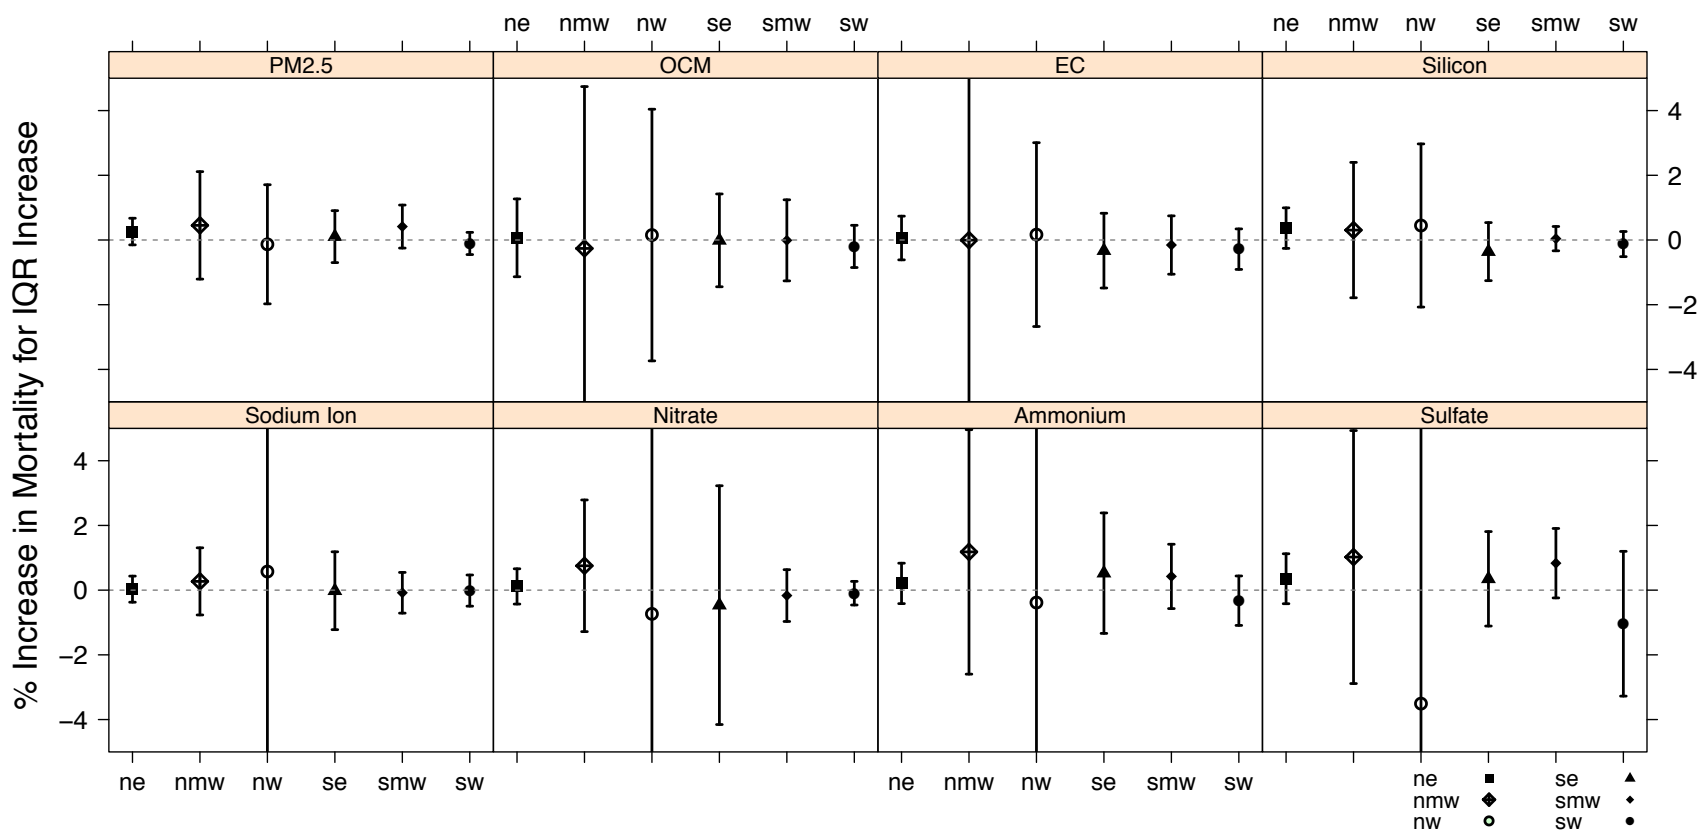

Supplemental Material, Figure S4: Region-specific estimated percent increase in mortality (95% posterior intervals [95% PI]) associated with an IQR increase in PM<sub>2.5</sub> constituents on two days before (lag 2) for single pollutant models. Region designations include: NE, northeast; NMW, north midwest; NW, northwest; SE, southeast; SMW south midwest; SW southwest. See Figure 1 in the main text for a map of the regions.

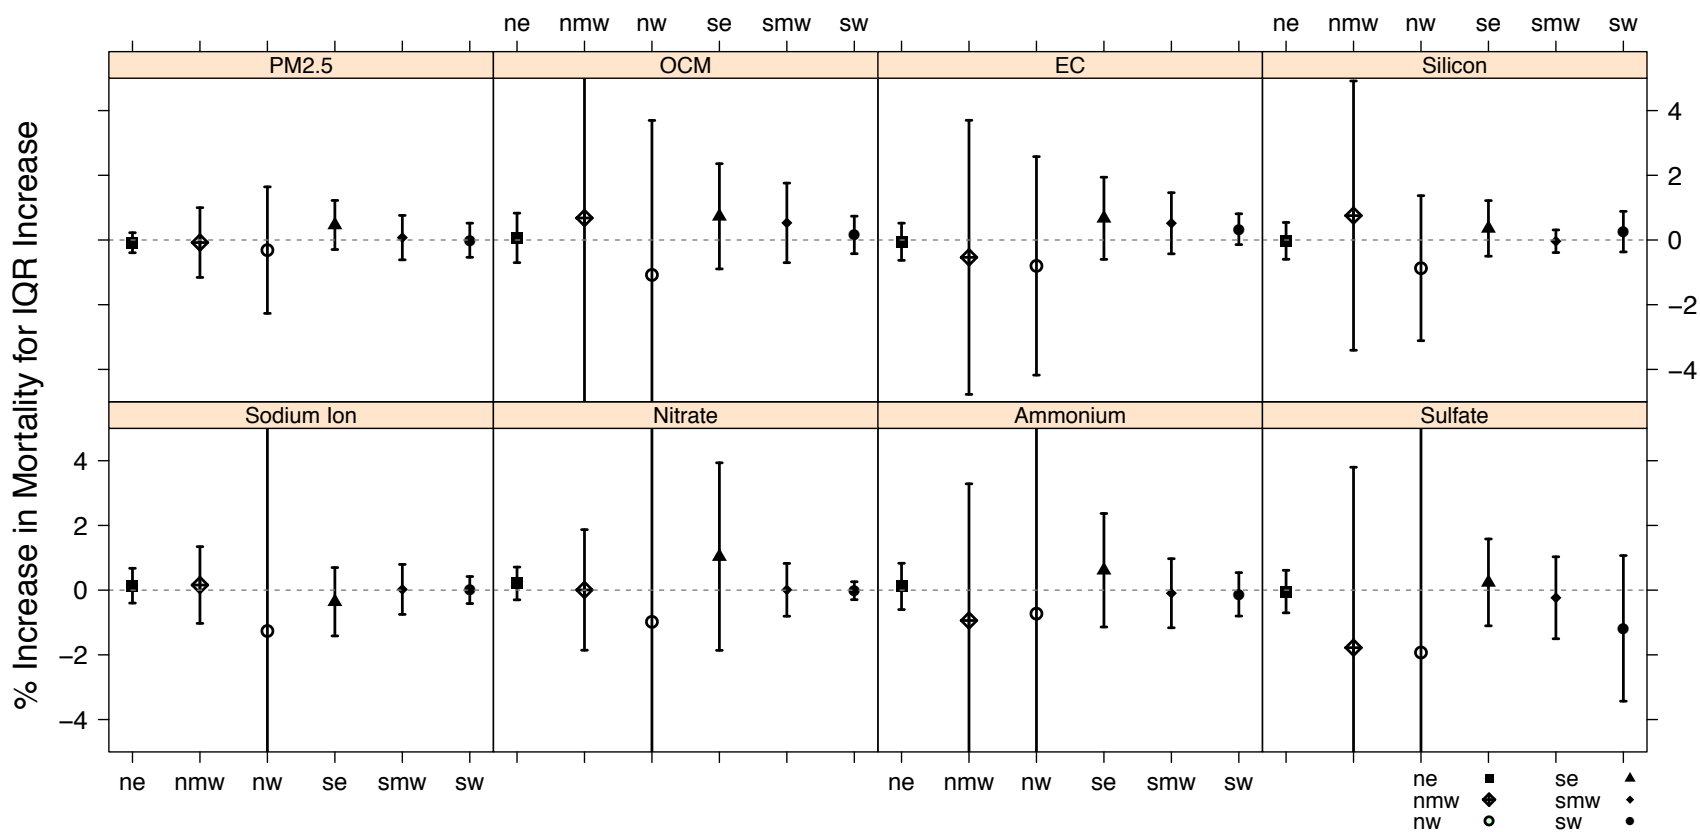

Supplement: ehp.1206185.s001.pdf [file ehp.1206185.s001.pdf]
